# Supplementary material
Source: bioRxiv or medRxiv preprint supplement (https://www.biorxiv.org/highwire/filestream/42891/field_highwire_adjunct_files/5/145060-6.pdf)
Supplement: Supplementary file [file 145060-6.pdf]

Table 1. Strains used in this study

| Strain name                                                                              | Lab number                                        | Genotype                                                                                   | Reference                   |
|------------------------------------------------------------------------------------------|---------------------------------------------------|--------------------------------------------------------------------------------------------|-----------------------------|
| 74-D694                                                                                  | D233                                              | <i>MatA ade1-14 ura3-52 leu2-3,112 trp1-289 his3-200 high [PIN<sup>+</sup>]</i>            | (Derkatch et al., 1997)     |
| 74-D694 <i>sac6</i> Δ                                                                    | M264                                              | <i>MatA ade1-14 leu2-3,115 ura3-52 trp1-289 his3-200 sac6::HIS3 high [PIN<sup>+</sup>]</i> | (Manogaran et al., 2011)    |
| 74-D694 <i>vps5</i> Δ                                                                    | M265                                              | <i>MatA ade1-14 leu2-3,115 ura3-52 trp1-289 his3-200 vps5::HIS3 high [PIN<sup>+</sup>]</i> | (Manogaran et al., 2011)    |
| BY4741 <i>act1-120::NAT<sup>R</sup></i>                                                  | D191                                              | <i>MatA his3Δ1; leu2Δ-0; ura3Δ-0; act1-120::NATr; MET15; LYS2</i>                          | (Viggiano et al., 2010)     |
| BY4741 <i>act1-122::NAT<sup>R</sup></i>                                                  | D192                                              | <i>MatA his3Δ1; leu2Δ-0; ura3Δ-0; act1-122::NATr; MET15; LYS2</i>                          | (Viggiano et al., 2010)     |
| BY4741 <i>act1-129::NAT<sup>R</sup></i>                                                  | D193                                              | <i>MatA his3Δ1; leu2Δ-0; ura3Δ-0; act1-129::NATr; MET15; LYS2</i>                          | (Viggiano et al., 2010)     |
| BY4741 <i>act1-101::NAT<sup>R</sup></i>                                                  | D190                                              | <i>MatA his3Δ1; leu2Δ-0; ura3Δ-0; act1-101::NATr; MET15; LYS2</i>                          | (Viggiano et al., 2010)     |
| BY4741 [PIN <sup>+</sup> ]                                                               | M266                                              | <i>MatA his3Δ1; leu2Δ-0; ura3Δ-0; met15Δ-0 high [PIN<sup>+</sup>]</i>                      | This study                  |
| BY4741 <i>act1-120::NAT<sup>R</sup> [PIN<sup>+</sup>]</i>                                | M312                                              | <i>MatA his3Δ1; leu2Δ-0; ura3Δ-0; act1-120::NATr; MET15; LYS2 high [PIN<sup>+</sup>]</i>   | This study                  |
| BY4741 <i>act1-122::NAT<sup>R</sup> [PIN<sup>+</sup>]</i>                                | M231 (parent strain)                              | <i>MatA his3Δ1; leu2Δ-0; ura3Δ-0; act1-122::NATr; MET15; LYS2 high [PIN<sup>+</sup>]</i>   | This study                  |
| BY4741 <i>act1-129::NAT<sup>R</sup> [PIN<sup>+</sup>]</i>                                | M258                                              | <i>MatA his3Δ1; leu2Δ-0; ura3Δ-0; act1-129::NATr; MET15; LYS2 high [PIN<sup>+</sup>]</i>   | This study                  |
| BY4741 <i>act1-101::NAT<sup>R</sup> [PIN<sup>+</sup>]</i>                                | M256                                              | <i>MatA his3Δ1; leu2Δ-0; ura3Δ-0; act1-101::NATr; MET15; LYS2 high [PIN<sup>+</sup>]</i>   | This study                  |
| BY4741 <i>act1-122::NAT<sup>R</sup> [PIN<sup>+</sup>]</i> (M257 <i>act1-122</i> sibling) | M257 (sibling isolate)                            | <i>MatA his3Δ1; leu2Δ-0; ura3Δ-0; act1-122::NATr; MET15; LYS2 high [PIN<sup>+</sup>]</i>   | This study                  |
| BY4741 <i>act1-122::NAT<sup>R</sup> [PIN<sup>+</sup>]</i>                                | M254 (sibling isolate)                            | <i>MatA his3Δ1; leu2Δ-0; ura3Δ-0; act1-122::NATr; MET15; LYS2 high [PIN<sup>+</sup>]</i>   | This study                  |
| BY4741 <i>act1-122::NAT<sup>R</sup> [PIN<sup>+</sup>]</i>                                | M314 (2 <sup>nd</sup> generation sibling isolate) | <i>MatA his3Δ1; leu2Δ-0; ura3Δ-0; act1-122::NATr; MET15; LYS2 high [PIN<sup>+</sup>]</i>   | This study                  |
| BY4741 <i>act1-122::NAT<sup>R</sup> [PIN<sup>+</sup>]</i>                                | M315 (2 <sup>nd</sup> generation sibling isolate) | <i>MatA his3Δ1; leu2Δ-0; ura3Δ-0; act1-122::NATr; MET15; LYS2 high [PIN<sup>+</sup>]</i>   | This study                  |
| Tester Strain                                                                            | D163                                              | <i>MATα trp1 leu2 ura2 [psi<sup>-</sup>][pin<sup>-</sup>]</i>                              | (Manogaran et al., 2010)    |
| Cytoduction donor strain                                                                 | D127                                              | <i>MATα ade2-1 lys1-1 his3-11,15 leu1 kar1-1 cyh<sup>R</sup> High [PIN<sup>+</sup>]</i>    | (Bradley and Liebman, 2003) |
